# Supplementary material
Source: publisher figshare collection journal article supplement (https://gsajournals.figshare.com/ndownloader/files/13750424)
Supplement: Supplementary file 1 [file 13750424]

#! /usr/bin/env python

**import** sys, math, os, argparse

# Usage: -din directory of files to find repeats in

#        -word word_size

parser = argparse.ArgumentParser(description='Find repeats in a directory of fasta sequence files')

parser.add_argument('-din', action='store', dest='din', help='Input .fasta directory')

parser.add_argument('-word', action='store', dest='word', help='Word size for blast')

results = parser.parse_args()

din = results.din

word = results.word

li = os.listdir(din)

inputs = filter(**lambda** x: '.fasta' **in** x, li)

inputs.sort()

**for** i **in** range(len(inputs)):

    infile = str(inputs[i])

    os.system("/home/alan/applications/ROUSFinder.py -m "+word+" "+din+infile)
